# Supplementary material for: Coffee ring elimination and crystalline control of electrohydrodynamically printed high-viscosity perovskites
Source: Royal Society of Chemistry journal article supplement (doi:10.1039/c9tc04394b), 2019-01-01
Supplement: c9tc04394b1.pdf [file c9tc04394b1.pdf]

## Supporting Information

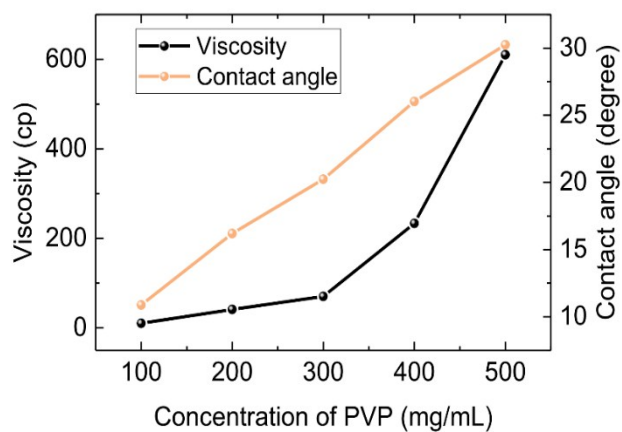

Figure S1. Viscosity and contact angle of perovskite solution with different PVP concentrations.

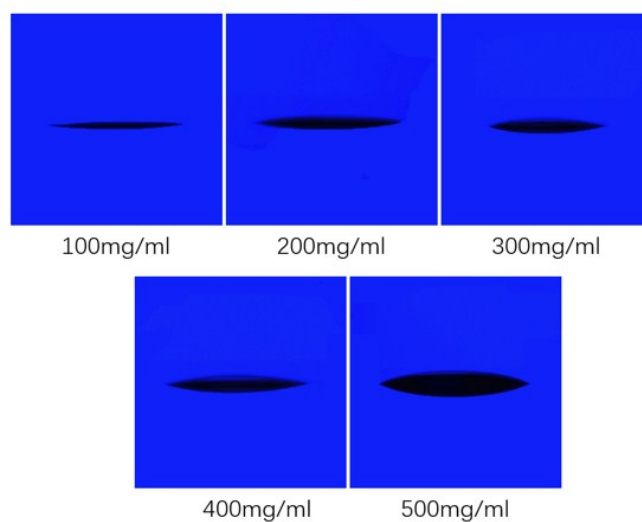

Figure S2. Contact angle of perovskite solutions with different PVP concentrations on substrate.

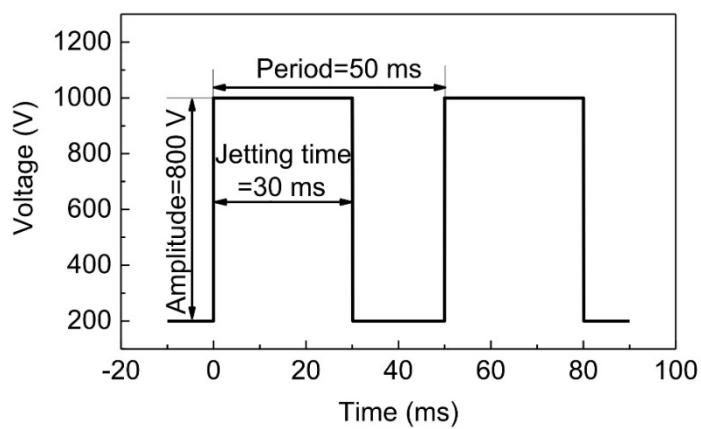

Figure S3. The driving square waveform in EHD printing.

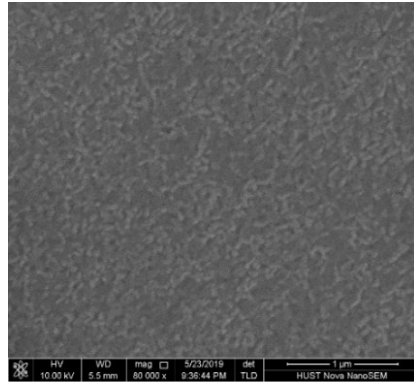

Figure S4. High-resolution SEM image of the as-synthesized CsPbBr<sub>3</sub> nanocrystals.

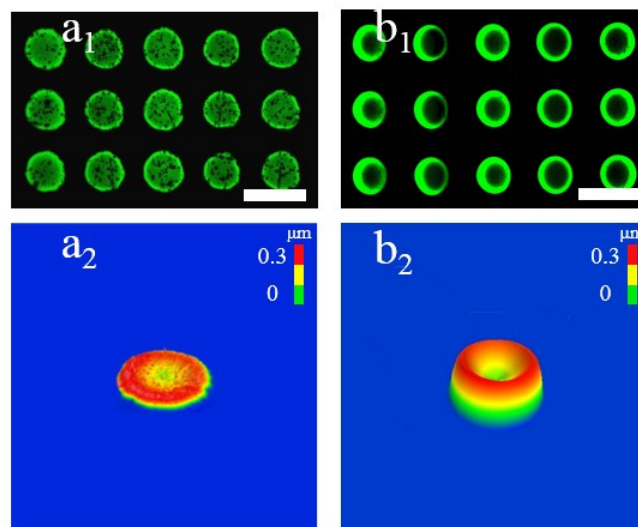

Figure S5. Dot arrays printed on substrates with different temperatures, where the solution is perovskite with PVP concentration of 300 mg/ml. (a) On a room temperature substrate, (b) On a 40 °C substrate. The scale is 200 μm.
